1 Geometric Network Analysis Provides Prognostic  
2 Information in Patients with High Grade Serous  
3 Carcinoma of the Ovary Treated with Immune  
4 Checkpoint Inhibitors

5 Rena Elkin\*, Jung Hun Oh\*, Ying L. Liu, Pier Selenica  
Britta Weigelt, Jorge S. Reis-Filho, Dmitriy Zamarin, Joseph O. Deasy<sup>‡</sup>  
Larry Norton<sup>‡</sup>, Arnold J. Levine<sup>†</sup>, Allen R. Tannenbaum<sup>†</sup> \*

\* Co-first authors

<sup>‡</sup> Co-senior authors

<sup>†</sup> Co-corresponding senior authors

6 June 7, 2021

7 **Abstract**

8 **Purpose:** Network analysis methods can potentially quantify cancer distur-  
9 bances in gene networks without introducing fitted parameters or variable se-  
10 lection. A new network curvature-based method is introduced to provide an  
11 integrated measure of variability within cancer gene networks. The method is  
12 applied to high grade serous ovarian cancers (HGSOCs) to predict response to  
13 immune checkpoint inhibitors (ICIs), and to rank key genes associated with  
14 prognosis.

15 **Methods:** Copy number alterations (CNAs) from targeted and whole exome  
16 sequencing data were extracted for HGSOC patients ( $n = 45$ ) treated with  
17 ICIs. CNAs at a gene level were represented on a protein-protein interaction  
18 network to define patient-specific networks with a fixed topology. A version of  
19 Ollivier-Ricci curvature was used to identify genes that play a potentially key  
20 role in response to immunotherapy and further to stratify patients at high risk  
21 of mortality. Overall survival (OS) was defined as the time from the start of

---

\*R. Elkin, J.H. Oh, and J.O. Deasy are with Department of Medical Physics, Memorial Sloan Kettering Cancer Center, NY, NY 10065; {ElkinR,OhJ,DeasyJ}@mskcc.org. B. Weigelt, P. Selenica, J.S. Reis-Filho are with the Department of Pathology, Memorial Sloan Kettering Cancer Center, NY, NY 10065; {weigeltb,selincp,reisfilj}@mskcc.org. A.J. Levine is with the Institute for Advanced Study, Princeton, NJ 08540; alevine@ias.edu. D. Zamarin, Y.L. Liu, L. Norton are with the Department of Medicine, Memorial Sloan Kettering Cancer Center, NY, NY 10065; {zamarind,liuy3,nortonl}@mskcc.org. A. Tannenbaum is with the Departments of Computer Science and Applied Mathematics & Statistics, Stony Brook University, Stony Brook, NY 11794; allen.tannenbaum@stonybrook.edu

22 ICI treatment to either death or last follow-up. Kaplan-Meier analysis with  
23 log-rank test was performed to assess OS between the high and low curvature  
24 classified groups.

25 **Results:** The network curvature analysis stratified patients at high risk of  
26 mortality with  $p=0.00047$  in Kaplan-Meier analysis. Genes with high curvature  
27 were in accordance with CNAs relevant to ovarian cancer.

28 **Conclusion:** Network curvature using CNAs has the potential to be a novel  
29 predictor for OS in HGSOC patients treated with immunotherapy.

## 30 1 Introduction

31 Facilitated by advances in genomic sequencing techniques and the ongoing de-  
32 velopment of highly curated protein-protein interactome (PPI) databases (e.g.,  
33 Human Reference Protein Database (HPRD, [1, 2]), The Human Reference In-  
34 teractome (HuRI, [3]), Search Tool for the Retrieval of Interacting Genes/ Pro-  
35 teins (STRING, [4])), we adopt a network approach to investigate biological  
36 features pertaining to overall survival (OS) in ovarian cancer (OC) based on  
37 copy number alterations (CNAs) in tumor tissues. The past decade has seen  
38 a large rise in the development of methods for analyzing large, complex net-  
39 works, as exhibited by the rapidly growing literature. We draw on geometric  
40 notions to inform about the network structure, defined by evidence-based inter-  
41 actions provided by the PPI. Our network analysis methodology is unsupervised  
42 without fitting parameters or feature selection and is not constrained to the un-  
43 derlying topology alone. Indeed, since cancer has been demonstrated to exhibit  
44 functional robustness in connection to geometric properties of its network repre-  
45 sentation [5], we utilize Ollivier’s discrete notion of Ricci curvature on weighted  
46 graphs, referred to as *Ollivier-Ricci (OR) curvature* [6].

47 This focus of this paper is to introduce a geometric network method for can-  
48 cer with the key application to high grade serous ovarian cancer (HGSOC).  
49 Biomarkers of response to immune checkpoint blockade in HGSOC remain  
50 largely unknown. Unlike non-small cell lung cancers and melanomas that ex-  
51 hibit increased immunogenicity due to high tumor mutational burden (TMB)  
52 [7, 8, 9, 10, 11], HGSOCs exhibit low TMB [12]. In virtually all cases, HGSOCs  
53 are a disorder of loss of function gene mutations (TP53) leading to CNAs, and  
54 subsequently resulting in over-expressed copy number in multiple genes includ-  
55 ing oncogenes (e.g., K-RAS, c-MYC, cyclin E and AKT protein kinase) com-  
56 monly due to aneuploidy [13, 14]. The impact of these alterations on response to  
57 immunotherapy is unknown; furthermore, it is unlikely that individual pathway  
58 alterations would be strongly predictive. This manuscript develops a mathe-  
59 matical method that constructs a network of these gene pathways where each  
60 node (gene) is quantitated by CNAs and for each tumor, the changes in the ar-  
61 chitecture or connectivity of the network are measured by a parameter termed  
62 *curvature* of the edges of the network. Curvature measures the connectivity  
63 in the sense of feedback loops, and the copy number measures the abundance of  
64 each node and its projected impact upon the changes in the network architec-

65 ture. (More rigorous details about this will be given in the Methods Section.)  
66 Nodal curvature may exhibit more variation than the CNAs, reflecting the in-  
67 tegration of the gene copy numbers and the local impact of their alteration on  
68 the network. Thus, curvature has the potential to differentiate responders from  
69 non-responders in patients treated with immune checkpoint inhibitors (ICIs)  
70 that could not be predicted from a single gene alone.

71 Curvature is a local measure of how a geometric object (e.g., curve, surface,  
72 space) deviates from being *flat* in the Euclidean sense. While the physical inter-  
73 pretation of curvature in 3-dimensional Euclidean space is a familiar concept,  
74 intuition for curvature as a rigorous mathematical concept is often elusive, as  
75 the mathematical theory is not bound by the same physical constraints. This  
76 allows for curvature to be generalized to continuous spaces of higher dimensions  
77 (classically, Riemannian manifolds), and even to discrete spaces (Figure 1).

78 The mathematical construct, however, is not solely of abstract, theoretical  
79 value. The archetypical example is the curvature of space-time which was integral  
80 to Einstein’s theory of general relativity. Although perhaps less intuitive,  
81 the geometric insight that curvature provides is applicable to other physical phe-  
82 nomena. In particular, change in OR curvature [6] has a strong mathematical  
83 connection to changes in robustness via change in entropy. Note that we are  
84 using *change in curvature* in the sense as a difference in curvature  $\Delta\kappa$  between  
85 networks. This is a remarkable result facilitated by the theory of optimal mass  
86 transport (OMT) attributed to Sturm, Lott, and Villani [15, 16]. The change  
87 in OR curvature has previously been used as an effective quantitative proxy  
88 for the qualitative notion of changes in robustness in various types of networks  
89 [5, 17]. In the present work, we employ curvature to predict patient survival and  
90 investigate primary components of functional robustness as well as to identify  
91 key genes contributing to functional dysregulation in HGSOc.

92 Various biomarkers including PD-L1 and the spatial distribution and com-  
93 position of the immune microenvironment are being investigated in the context  
94 of response to ICI [12], but the present work focuses on extracting information  
95 from gene level information. It is becoming more apparent that the use of ge-  
96 nomic data (e.g., mutations, gene expression, CNAs) with the corresponding  
97 functional network representation can provide more insights into understanding  
98 the underlying biology of cancer. Thus, graph-based tools may be more powerful  
99 for investigating complex genomic networks than methods that aim to analyze  
100 and quantify the data independently.

101 Genomic networks have a topology (i.e., a connectivity structure), but they  
102 also have a geometry, i.e., curvature, which gives a measure of their functional  
103 robustness. Graph curvature is intimately related to the number of invariant  
104 triangles, i.e., *feedback loops* at a given vertex, and the curvature between two  
105 vertices describes the degree of overlap between their respective neighborhoods  
106 [18]. Informally, graphs with positive curvature characteristically contain many  
107 triangles (redundant feedback loops), contributing to its functional robustness  
108 with respect to a damaged or deleted edge. The more neighbors two given nodes  
109 have in common (i.e., triangles), the easier it is for information to flow between  
110 them. By weighing the ease with which information can be transferred from one

111 node to another against the ground distance between them, curvature provides  
112 a local measure of functional connectivity compared to ordinary measures of  
113 connectivity which identify hubs based on degree. We show not only that the  
114 total curvature of a network can be used to predict overall patient survival in  
115 OC, but it is also more effective than standard clinical parameters such as TMB.

116 Typically, the curvature is computed on a network using the standard hop  
117 distance (where every edge in a path connecting two nodes is treated as a hop)  
118 with node weights that are continuous in nature (e.g., gene expression). Here,  
119 we use a *weighted hop distance* derived from the data as the underlying graph  
120 metric, so the distance between two nodes depends not only on the topology,  
121 but on the likelihood of interaction as well. Using node weights assigned by  
122 (discrete) CNAs, we show that curvature may also be informative in the dis-  
123 crete data setting. Furthermore, we show that the network topology without  
124 any additional information may be used as a reference to identify potential key  
125 players responsible for the functional robustness, even when limited data is avail-  
126 able, as demonstrated in this study. Top identified genes such as TP53, whose  
127 known aberrant functional behavior has been attributed as a leading influence  
128 in the development/progression of ovarian cancer [19], serve as validation for  
129 the proposed methodology.

130 Specifically, we create a shared topology, but with sample-specific gene inter-  
131 action networks. The interactions are taken from the HPRD, where the protein  
132 interactions are assumed to serve as a proxy for the underlying gene interac-  
133 tions. We then supplement topology (i.e., connectivity) with sample-specific  
134 node weights taken to be the given copy number data. For each network, curva-  
135 ture is then computed at three scales: on edges, nodes, and the entire network.  
136 Analogous to Ricci curvature defined on tangent directions at a point on a Rie-  
137 mannian manifold and its contraction *scalar curvature* defined on the points of  
138 the manifold, the formulation of OR curvature is computed on all edges in the  
139 network and scalar curvature is computed on all nodes by contracting the OR  
140 (edge) curvature with the invariant distribution associated with the weighted  
141 network [6]. The *total curvature* of the network is then computed by contracting  
142 the scalar curvature to a single scalar. (See Eq. (9) for the precise definition.)

## 143 2 Methods

144 We start with a brief, informal discussion on curvature to build some intuition  
145 before introducing the formal description of curvature as it was used in this  
146 work (Figure 1).

147 The remarkable property of Gaussian curvature is that it is intrinsic to  
148 the surface and therefore independent of how the surface is embedded in 3-  
149 dimensional space. For example, the Earth appears flat when looking into the  
150 horizon, yet we know that the Earth is round. Determining a surface's curvature  
151 by visual inspection alone can be very misleading, as the curvature may appear  
152 to change depending on one's perspective. More generally, suppose we take our  
153 surface to be a sheet of paper lying flat on a desk. One would correctly guess

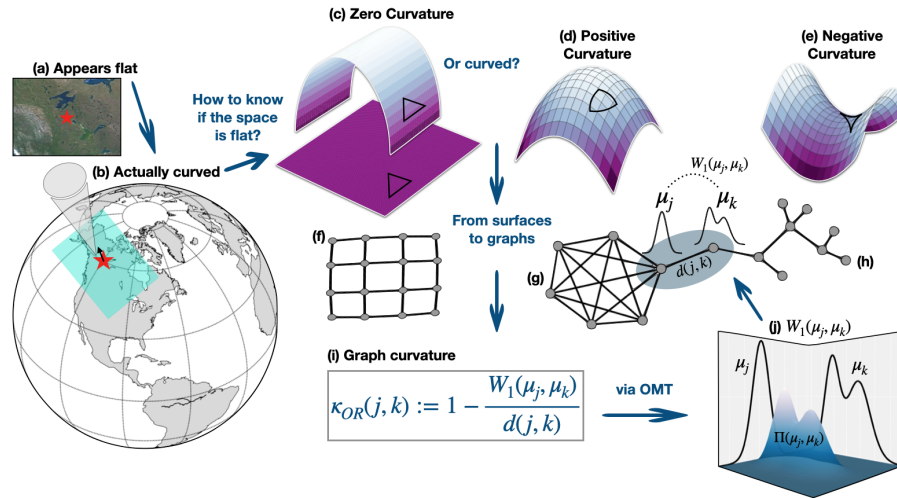

Figure 1: Curvature intuition on graphs. Curvature is an intrinsic property of a surface, and therefore does not depend on how it is situated in space. For example, (b) we know the Earth is curved, (a) even though it appears flat when standing on its surface. Similarly, (c) a plane that is bent into an arc still has zero curvature. The apparent curvature is merely due to how it is embedded in space. Examples of canonical surfaces with zero, positive and negative curvature are shown, respectively, in (c), (d) and (e). Geodesic triangles can be used to determine the curvature of a surface without specifying its embedding. Compared to (Euclidean) flat space (c), fat (d) and skinny (e) triangles are characteristic of positive and negative curved spaces, respectively. Going from smooth surfaces to graphs, (f) a grid is analogous to a surface with zero curvature while (g) many triangles (indicative of redundancies or feedback mechanisms) are characteristic of graphs with positive curvature and (h) tree-like topologies (indicative of diverging paths) are characteristic of graphs with negative curvature. (i) On a graph, curvature between two nodes  $j$  and  $k$  is characterized by the ratio of the transport distance  $W_1(\mu_j, \mu_k)$  between distributions  $\mu_j$  and  $\mu_k$  (defined respectively on nodes  $j$  and  $k$ ) and the underlying ground distance  $d(j, k)$  between the two nodes. The transport distance ( $W_1$ ) comes from the theory of optimal mass transport (OMT) and provides a *functional* distance between the nodes that accounts for the shape of the distribution and amount of shared neighbors. Curvature is positive (resp., negative) when the transport distance (i.e., information) between nodes is smaller (resp., larger) than the ground distance between them, reflecting the ease with which information is shared between nodes.

154 that it has zero curvature. If the scenario is changed and the paper is bent  
155 into an arc, it may appear to have non-zero curvature. However, this apparent  
156 curvature is merely an effect of its *embedding* in space and is not intrinsic to the  
157 surface itself. Thus, a plane and a cylindrical arc are all examples of surfaces  
158 with zero Gaussian curvature while a sphere and a hyperbolic disc are examples  
159 of surfaces with positive and negative Gaussian curvature, respectively [20].

160 Rather than look at the surface as it is embedded in 3-dimensional space  
161 from the perspective of an outsider, the key is to treat the surface as the  
162 space itself. In that case, we can determine if the space is curved through  
163 the use of *geodesics*, the curves of (locally) shortest length between two points.  
164 (Geodesics generalize the straight line in Euclidean space.) One way to tell if the  
165 space is curved is to sum up the interior angles of a geodesic triangle. Geodesic  
166 triangles on a surface with positive (resp., negative) Gaussian curvature are *fat*  
167 (resp., *skinny*) compared to the triangle in Euclidean space. Loosely speaking,  
168 curvature can be inferred by the local behavior of geodesics – geodesics converge  
169 in regions of positive curvature and diverge in regions of negative curvature. On  
170 Riemannian manifolds, Ricci curvature is intimately related to the spread of  
171 geodesics emanating from the same point [20].

172 While there are many ways to characterize the local behavior of Ricci cur-  
173 vature, we focus on Ollivier’s characterization that is relevant for our purposes:  
174 namely that in regions of positive (resp., negative) Ricci curvature, geodesic  
175 balls (on average) are closer (resp., farther) than their centers [20]. (A “geodesic  
176 ball” of radius  $\epsilon$  centered at a given point  $p$  is defined as the image under the  
177 exponential map of the ball of radius  $\epsilon$  on the tangent space at  $p$ ). This is  
178 in contrast to Euclidean space where the distances between geodesic balls and  
179 their centers are the same. Ollivier’s characterization generalizes this notion of  
180 Ricci curvature applicable to graphs by replacing the geodesic balls with proba-  
181 bility measures  $\mu_j$  [6]. In the Euclidean case, one may think of this as replacing  
182 points (delta functions), by small Gaussian balls (“fuzzified points”). The trans-  
183 portation distance between measures  $\mu_j$  and  $\mu_k$ , prescribed by the Wasserstein  
184 distance  $W_1$ , is used in lieu of the average distance between geodesic balls. The  
185 Wasserstein distance accounts for the geometry of the space and the distance  
186 between distributions associated with two nodes is related to the overlap of their  
187 neighborhoods. The rigorous mathematical details will be given now.

## 188 2.1 Wasserstein distance

189 The Wasserstein distance is a particular instance of the *optimal mass transport*  
190 (OMT) problem. It is a natural candidate for comparing probability measures  
191 because it accounts for both the shape of the distributions (i.e., weighted values)  
192 and the distance on the underlying space. The OMT problem, originated by  
193 Gaspard Monge [21], seeks the optimal way to redistribute mass with minimal  
194 transportation cost. Leonid Kantorovich reformulated and relaxed the problem  
195 in the context of resource allocation [22]; for more details, see [23, 24, 25]. We  
196 consider the following discrete formulation. Since we will be applying the theory  
197 to weighted graphs, this will be sufficient.

198 Accordingly, let  $\mathcal{X}$  denote a metric measure space equipped with distance  
199  $d(\cdot, \cdot)$ . Given two (discrete) probability measures  $\mu_0$  and  $\mu_1$  on  $\mathcal{X}$ , the **Wasser-**  
200 **stein distance**  $W_1$  between  $\mu_0$  and  $\mu_1$  is defined as

$$201 \quad W_1(\mu_0, \mu_1) := \inf_{\pi \in \Pi(\mu_0, \mu_1)} \sum_{x,y} \pi_{xy} d_{xy}, \quad (1)$$

202 where  $\Pi(\mu_0, \mu_1)$  is the set of joint probabilities on  $\mathcal{X} \times \mathcal{X}$  with marginals  $\mu_0$   
203 and  $\mu_1$ . Here,  $\pi_{xy}$  may be interpreted as the amount of mass moved from  $x$   
204 to  $y$  and the cost of transporting a unit of mass is taken to be the distance  
205 travelled (i.e.,  $d$ ). Thus, the Wasserstein distance (1) gives the minimal net  
206 cost of transporting mass distributed by  $\mu_0$  to match the distribution of  $\mu_1$ .  
207 The OMT problem therefore seeks the optimal *transference plan*  $\pi \in \Pi(\mu_0, \mu_1)$   
208 found to be the infimal argument for which the Wasserstein distance is realized.

## 209 2.2 Curvature

210 The interplay between Ollivier-Ricci curvature, network entropy and functional  
211 robustness is linked by optimal mass transport (OMT), and is rich in theory.  
212 We outline this now, beginning with the Ollivier-Ricci curvature [6].

213 Based on the work of von Renesse and Sturm [16], Ollivier extended the  
214 notion of Ricci curvature, defined on a Riemannian manifold, to discrete metric  
215 measure spaces [6]. Specifically, let  $\mathcal{X}$  be a metric measure space equipped with  
216 a distance  $d$  such that for each  $x \in \mathcal{X}$ , one is given a probability measure  $\mu_x$ .  
217 The probability measure  $\mu_x$  can be thought of as *fuzzifying* or *blurring* the point  
218  $x$ . For two points  $x, y \in \mathcal{X}$ , **Ollivier-Ricci curvature** is defined as

$$219 \quad \kappa_{OR}(x, y) := 1 - \frac{W_1(\mu_x, \mu_y)}{d(x, y)}, \quad (2)$$

220 where  $W_1$  is the *Wasserstein distance*.

## 221 2.3 Curvature on graphs

222 For our purposes, the metric measure space is taken to be a weighted graph  
223  $G = (V, E)$  with nodes (vertices)  $V$  and edges  $E$ .  $G$  is assumed to be a *simple*,  
224 *connected* and *undirected* graph. Instead of points  $x$  in a metric space, we now  
225 consider nodes  $x_j \in V$ , denoted simply by its subscript  $j$ . In this work, the graph  
226 is constructed as follows. Each node  $j \in V$  represents a gene; hereafter node and  
227 gene are used interchangeably. Edges  $e = (j, k) \in E$  define known interactions  
228 between genes (nodes) at the protein level (here given by HPRD) and  $j \sim k$   
229 denotes that  $k$  is a neighbor of  $j$ . We then incorporate copy number (CN) values  
230 as nodal weights, denoted  $w_j$ . Note that for  $j \in V$ , we take  $w_j = (CN)_j + 1$ ;  
231 the affine translation is used to ensure all weights are positive.

232 We treat the weighted graph as a Markov chain. In this context, the proba-  
233 bility measure  $\mu_j$  attached to node  $j \in V$  can be thought of as the probability  
234 of a 1-step random walk starting from node  $j$ . The 1-step transition probabili-  
235 ty  $p_{jk}$  of going from  $j$  to  $k$  is expressed by the *principle of mass action* [26].



236 According to this principle, if there is a known connection between gene  $j$  and  
 237 gene  $k$  (i.e.,  $(j, k) \in E$ ), then the probability that they interact is proportional  
 238 to the product of their CN values:

$$239 \quad p_{jk} \propto w_j w_k. \quad (3)$$

240 Normalizing the mass action over all possible edges to ensure that  $p_{jk}$  is a  
 241 probability, i.e.,  $\sum_{j \sim k} p_{jk} = 1$ , we define the transition probabilities  $p_{jk}$  of the  
 242 stochastic matrix  $P = [p_{ij}]$  associated with the Markov chain as follows:

$$243 \quad p_{jk} = \begin{cases} \frac{w_k}{\sum_{j \sim l} w_l}, & \text{if } j \sim k \\ 0, & \text{otherwise.} \end{cases} \quad (4)$$

244 Accordingly, for each gene  $j$ , we associate a probability measure  $\mu_j$  defined on  
 245 the node set  $V$  with  $n$  associated nodes

$$246 \quad \mu_j = [p_{j1}, p_{j2}, \dots, p_{jn}], \quad j = 1, \dots, n. \quad (5)$$

247 Alternatively,  $\mu_j$  can be thought of as *fuzzifying* the node  $j$  over its 1-step  
 248 neighborhood.

### 249 **2.3.1 Graph distance**

250 We have now specified the points ( $x$ ) and measures ( $\mu_x$ ) needed to compute OR  
 251 curvature in Eq. (2) on a graph. All that remains is the distance  $d(x, y)$ . In  
 252 lieu of the commonly used *hop distance*, i.e., the distance between two nodes  
 253  $j, k \in V$  that is defined as the shortest path length over all paths connecting  $j$   
 254 and  $k$ , we take the corresponding graph distance  $d_{jk}$  to be the ***weighted hop***  
 255 ***distance*** (whop).

256 More precisely, for fixed nodes  $j$  and  $k$ , let  $P^{jk}$  denote a path connecting  
 257 them. Let  $\{w_1^{jk}, \dots, w_n^{jk}\}$  be the set of all the associated edge weights. Then  
 258 we set

$$259 \quad \ell(P^{jk}) := \sum_{i=1}^n \frac{1}{w_i^{jk}}. \quad (6)$$

260 Denoting by  $\mathcal{P} := \{P_1^{jk}, \dots, P_m^{jk}\}$ , the set of all possible paths connecting  $j$  and  
 261  $k$ , we define the ***weighted hop distance (whop)*** between  $j$  and  $k$  to be:

$$262 \quad d_{jk} := \min_{1 \leq u \leq m} \ell(P_u^{jk}). \quad (7)$$

263 Note that the edge weights  $w_{uv}$  for all edges  $e = (u, v) \in E$  are constructed as

$$264 \quad w_{uv} := \frac{p_{uv} + p_{vu}}{2}. \quad (8)$$

265 This formulation was chosen so the distance between two nodes is inversely re-  
 266 lated to the probability of their interaction. Thus, the higher (resp., lower) the



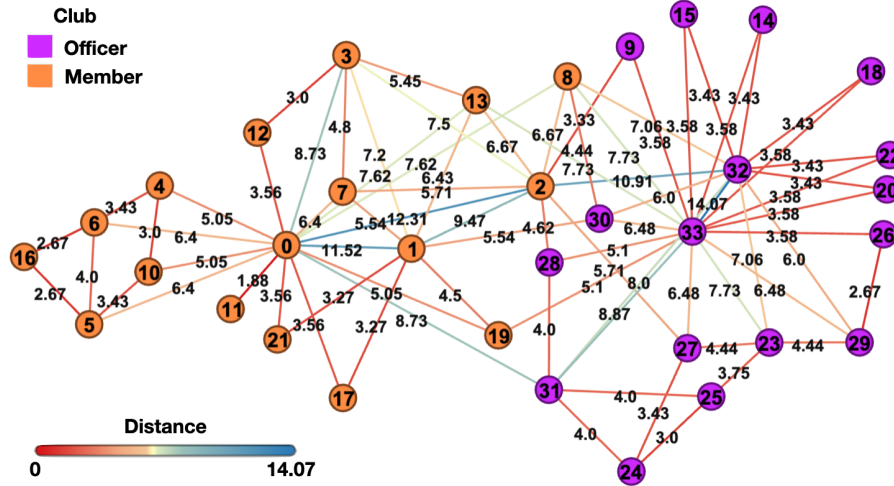

Figure 2: Weighted hop distances are shown for every edge in Zachary’s Karate Club Graph [27] with all node weight values initialized equal to 1. The node color indicates if the corresponding person is a club officer (purple) or member (orange). The distance between edge-adjacent nodes is shown at the edge midpoint.

267 probability of two nodes interacting, the smaller (resp., larger) the distance between  
 268 them should be. The average is taken merely so the distance is symmetric,  
 269 i.e.,  $d_{jk} = d_{kj}$ .

270 Using Zachary’s Karate Club graph [27] as an example, the resulting whop  
 271 distance for all edges is shown in Figure 2. A more detailed comparison between  
 272 the hop and whop distances, illustrated by heat maps of the corresponding  
 273 distance matrices of all node pairs in the network, is shown in Figure 3.

### 274 2.3.2 Edge curvature

275 With the choice of graph distance in Eq. (7), the OR curvature in Eq. (2) can  
 276 now be computed between any two nodes in the graph. Due to the large nature  
 277 of the graphs of interest, we constrain the curvature computation to edges.  
 278 Notice, from the curvature definition in Eq. (2), the ratio  $\frac{W_1(\mu_j, \mu_k)}{d_{jk}}$  relates the  
 279 transport cost of moving the distribution (i.e., *fuzzy ball*) associated with  $j$  to  
 280  $k$  to the ground distance. Informally, the more the neighborhoods of two nodes  
 281 overlap, the lower the transportation cost between them and thus the higher  
 282 the curvature associated with the edge. As such, curvature informs on the local  
 283 functional relationship between neighborhoods.

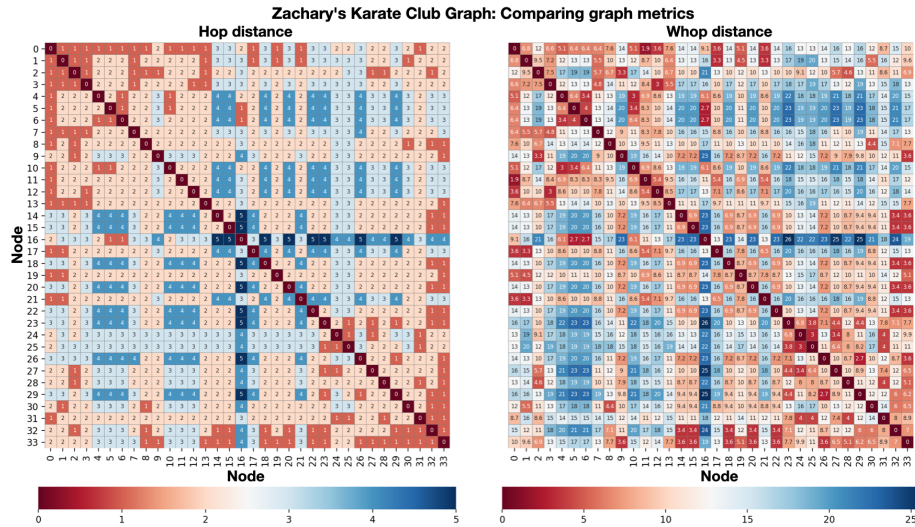

Figure 3: Comparing graph metrics. The distances between every two nodes in Zachary’s Karate Club Graph [27], with all node weight values initialized equal to 1, are shown using (left) the hop distance and (right) weighted hop distance.

284 **2.3.3 Scalar and total curvature on graphs**

285 In order to obtain a node-level measure of curvature, we consider a contraction  
 286 of the edge curvatures, analogous to *scalar curvature* defined on points of a  
 287 manifold in Riemannian geometry [20]. In this work, we define the (nodal)  
 288 *scalar curvature* of gene  $j$  to be the weighted sum of the curvatures on all  
 289 edges incident to  $j$ :

290 
$$\kappa_j := \pi_j \sum_{j \sim k} \kappa_{OR}(j, k), \quad (9)$$

291 where the weight  $\pi_j$  is the  $j^{\text{th}}$  component of the stationary distribution  $\pi$  asso-  
 292 ciated with the Markov chain  $P$  [26]:

293 
$$\pi = \pi P, \quad \sum_j \pi_j = 1. \quad (10)$$

294 The stationary distribution in this setting (connected graph) is also the limit-  
 295 ing distribution of the Markov chain, known as the *stationary* or *equilibrium*  
 296 distribution. Thus, the quantity  $\pi_j$  describes the relative importance of node  
 297  $j$  with respect to all other nodes. We therefore scale the nodal curvature by  
 298 its component in the stationary distribution in order to correct for nodal bias.  
 299 Furthermore, the stationary distribution has a closed form that may be easily  
 300 computed as follows:

301 
$$\pi_j = \frac{1}{Z} w_j \sum_{j \sim k} w_k \quad (11)$$

302 where  $Z$  is the normalization factor. We note that unweighted and alternative  
303 weightings have been proposed [28, 29].

304 Lastly, we define the **total curvature**  $\kappa_G$  of a network to be the net scalar  
305 curvature, summed over all nodes in the graph

$$306 \quad \kappa_G := \sum_j \kappa_j. \quad (12)$$

## 307 2.4 Curvature and robustness

308 Sturm [16], Lott and Villani [15] related a lower bound on the Ricci curvature  
309 of a smooth Riemannian manifold to the entropy of densities along a constant-  
310 speed geodesic with the use of the Wasserstein distance. This laid the ground-  
311 work for the connection between curvature, entropy, and the Wasserstein metric,  
312 and led to the remarkable observation that changes in Ricci curvature  $\Delta\kappa_{Ric}$   
313 are positively correlated with changes in (Boltzmann) entropy  $\Delta S$ :

$$314 \quad \Delta\kappa_{Ric} \times \Delta S \geq 0. \quad (13)$$

315 The positive correlation between changes in curvature  $\Delta\kappa_{Ric}$  and changes in  
316 robustness  $\Delta R$ :

$$317 \quad \Delta\kappa_{Ric} \times \Delta R \quad (14)$$

318 is realized by Eq. (13) and the fluctuation theorem [30] from large deviations  
319 theory indicates that changes in entropy are positively correlated with changes  
320 in robustness  $\Delta R$  :

$$321 \quad \Delta S \times \Delta R. \quad (15)$$

322 Here, *robustness* refers to the ability of a system to recover or maintain its ability  
323 to function after it is perturbed in some way (e.g., stress signal).

324 Curvature is a particularly attractive method for analyzing key nodes and  
325 interactions in large complex PPI networks primarily due to its intimate connec-  
326 tion to robustness. This connection is linked by entropy as shown in Eqs. (13,  
327 15), bridging this geometric analysis to an interesting perspective on the rela-  
328 tionship between the topological and functional properties of the weighted net-  
329 work. With this notion of the change in curvature as a proxy for the more qual-  
330 itative notion of functional robustness, we rank genes according to the change  
331 in curvature with respect to the topology and between sub-groups identified;  
332 see the following Results Section.

## 333 2.5 Data description and processing

334 In this section, we outline the data description and processing that we used in  
335 our HGSOc analysis. Further details about the data may be found in [12].

336 First of all, TMB was calculated by dividing the number of non-synonymous  
337 mutations by the total size of the capture panel in megabases. Secondly, based  
338 on the CNAs by FACETS, the fraction of genome altered (FGA) was defined as  
339 the cumulative length of segments with log 2 or linear CNA value larger than 0.2

340 divided by the cumulative length of all segments measured. Large-scale state  
 341 transition (LST) scores, defined as a chromosomal breakpoint resulting in allelic  
 342 imbalance between adjacent regions of at least 10Mb, were determined, and a  
 343 cut-off  $\geq 15$  was employed for LST-high cases.

344 Next, regarding the data characteristics, we used DNA gene CNA data from  
 345 a subset of 69 women with recurrent OC who received immunotherapy from  
 346 a previously published series [12]. The subtypes of ovarian cancer are in fact  
 347 quite different diseases, originating in different cell types and being caused by  
 348 distinct mutations with diverse outcomes, and should therefore be analyzed  
 349 separately [19]. Accordingly, we restrict our re-analysis to a subset of samples  
 350 ( $n = 49$ ) with HGSOC, which is the most common and lethal subtype. Four  
 351 HGSOC patients had two samples, and the replicate samples were removed  
 352 from the analysis. This resulted in a total of 45 tumor samples, 32 of which  
 353 were metastases and 13 represented primary (adnexal) tumors, with 22 and 10  
 354 deaths in each group, respectively, at the time the study group was analyzed.  
 355 This forms a homogeneous group of cancers (Table 1). Tumor and normal  
 356 samples from the 45 patients were profiled utilizing the FDA-cleared Memorial  
 357 Sloan Kettering Integrated Mutation Profiling of Actionable Cancer Targets  
 358 (MSK-IMPACT) sequencing assay, their mean age was 58 years, and mean  
 359 TMB was 5.9. Patient selection and clinical characteristics are displayed in  
 360 Figure 4 and in Tables 1,2, respectively.

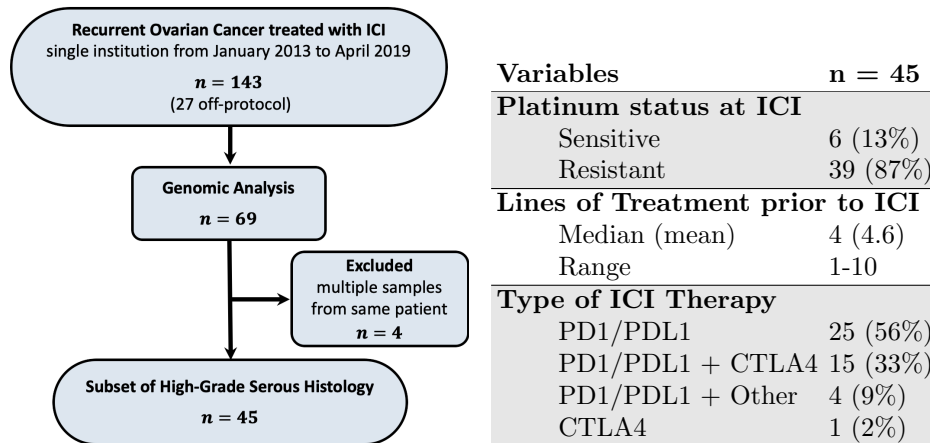

Figure 4: Patient selection

Table 1: Clinical characteristics of patients with recurrent high grade serous ovarian cancer administered immune checkpoint inhibitor (ICI) therapy.

361 CN segments were mapped to individual genes according to GRCh37 and  
 362 for each sample, each gene was assigned the maximum CN value of all segments  
 363 that mapped to it. After removing all genes with missing data and all genes

364 not in the HPRD network, we extracted the set of genes comprising the largest  
365 connected network (Supplementary Figure S7). This resulted in a CNA data  
366 matrix of size 3,489 (genes)  $\times$  45 (samples).

367 The network topology was constructed as follows. Edges between genes were  
368 defined by the PPI obtained from HPRD [1, 2]. The network topology was then  
369 taken to be the largest connected component in the HPRD network restricted to  
370 the set of genes in our data set. This resulted in a network with 9,710 edges and  
371 3,489 nodes with an average degree of 5.57. The rationale is that the established  
372 interactions between gene products serve as a viable proxy for the functional  
373 connectivity at the gene level.

374 Subject specific networks were created by assigning nodal weights  $w_j$  pre-  
375 scribed by the CN value. Specifically, the CN data took on discrete integer  
376 values in the range [0, 38]. In order to ensure all weights were positive, we used  
377 the translation  $w_j = x_j + 1$  where  $x_j$  is the CN value for gene  $j$ . For each subject,  
378 Markov chains were computed as defined in Eq. (4) followed by the associated  
379 stationary distribution in Eq. (11). Next, Ollivier-Ricci curvature using Eq. (2)  
380 was computed on each edge in the fixed network, scalar curvature defined in  
381 Eq. (9) was subsequently computed for each node and lastly, total curvature  
382 using Eq. (12) was computed for the network. A critical aspect of the curvature  
383 analysis is that it provides a *relative* quantity and it is the *change* in curvature  
384 that is of interest, indicative of changes in the network's capacity for communi-  
385 cation. Thus, we would expect that patients whose samples have a lower total  
386 curvature (i.e., a relative net decrease in capacity) would be associated with a  
387 poorer prognosis than those with higher total curvature values.

## 388 3 Results

### 389 3.1 Survival analysis

390 The prognostic value of the total curvature  $\kappa_G$  in Eq. (12) and standard genomic  
391 parameters including TMB, FGA and LST (representing homologous recombi-  
392 nation deficiency [HRD] status) were assessed with respect to the HGS cohort  
393 ( $n = 45$ ). For each parameter (TMB, LST, FGA,  $\kappa_G$ ), the cohort was stratified  
394 into two groups according to the 25th percentile (low vs. high) of individual val-  
395 ues. The cutoff was selected based on the location where the curve fitted to the  
396 sorted total curvature values starts slowly incrementing and is approximately  
397 linear (Supplementary Figure S3). An alternative cut point using maximally  
398 selected log-rank statistic [31, 32] was assessed as well and resulted in a com-  
399 parable split (Supplementary Figure S4). However, a larger cohort is needed  
400 for further validation. The effectiveness of each parameter in terms of OS was  
401 evaluated using the Kaplan-Meier (KM) analysis [33].

402 OS was defined from the start of immunotherapy treatment until either death  
403 or last follow-up [12]. Survival curves for each parameter were plotted according  
404 to the KM estimator, shown in Figure 5 along with the corresponding log-rank  
405  $p$ -values (total curvature:  $p = 0.00047$ ; TMB:  $p = 0.03153$ ; LST:  $p = 0.42865$ ;

406 FGA:  $p = 0.19568$ ). While both TMB and total curvature  $\kappa_G$  were found to be  
407 significant factors in predicting patient survival, the p-value for total curvature  
408 was almost 2 orders of magnitude smaller as compared to TMB, whose p-value  
409 was just marginally significant. The effective prognostic predictive power of the  
410 total curvature, particularly in comparison to the genomic parameters, is one  
411 of the major contributions of this work. See Supplementary Information for  
412 validation.

413 In order to assess that the prediction is not independent of receiving im-  
414 munotherapy treatment, we repeated the curvature and survival analysis pipeline  
415 on IMPACT data from HGSOC samples that did not receive ICIs. It is inter-  
416 esting to note that total curvature was not predictive of survival in this setting  
417 (Supplementary Figure S5), highlighting that our findings may be immunotherapy-  
418 specific. However, it is also important to point out that OS was defined from the  
419 time of diagnosis for the analysis of this dataset, whereas in the analysis of 45  
420 HGSOC patients treated with ICIs, OS was defined from the start date of im-  
421 munotherapy, and all 45 patients had recurrent tumors with a substantial time  
422 gap between the time of first diagnosis and the start date of immunotherapy.

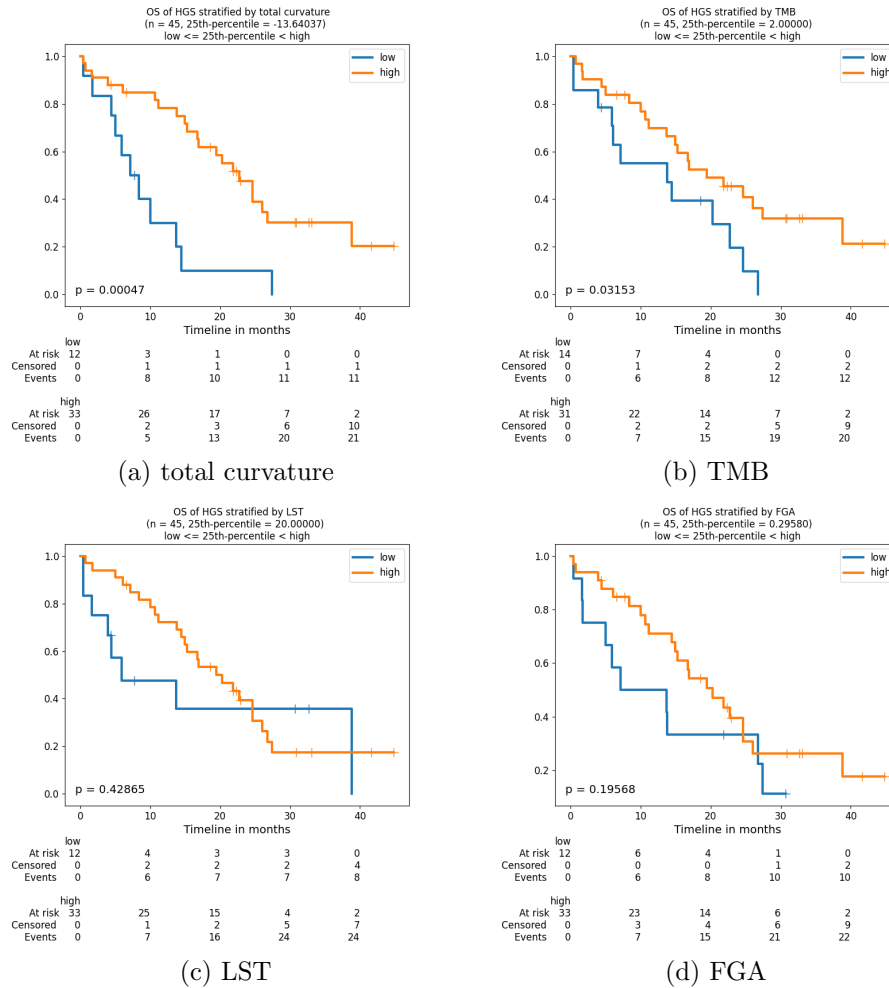

Figure 5: Survival curves for HGS samples ( $n = 45$ ) stratified low and high groups by the 25th percentile of total curvature and genomic parameters. P-values were derived from the log-rank test.



| Characteristic                               | All Patients     |                         |                          | <i>p</i> |
|----------------------------------------------|------------------|-------------------------|--------------------------|----------|
|                                              | (n=45)           | Low curvature<br>(n=12) | High curvature<br>(n=33) |          |
| Age at diagnosis (years)                     |                  |                         |                          | 0.062    |
| Mean ± SD                                    | 58.0 ± 9.3       | 62.3 ± 7.5              | 56.4 ± 9.4               |          |
| Range                                        | 27.0–75.0        | 49.0–75.0               | 27.0–75.0                |          |
| Median (IQR)                                 | 58.0 (52.0–64.0) | 64.0 (58.8–65.5)        | 55.0 (51.0–61.0)         |          |
| Age at start of ICI (years)                  |                  |                         |                          | 0.023    |
| Mean ± SD                                    | 62.1 ± 8.7       | 67.1 ± 6.9              | 60.3 ± 8.7               |          |
| Range                                        | 37.0–78.0        | 55.0–78.0               | 37.0–77.0                |          |
| Median (IQR)                                 | 62.0 (56.0–69.0) | 67.0 (63.3–70.3)        | 59.0 (55.0–66.0)         |          |
| Stage at diagnosis                           |                  |                         |                          | 0.502    |
| III                                          | 25               | 8                       | 17                       |          |
| IV                                           | 20               | 4                       | 16                       |          |
| Time from diagnosis to start of ICI (months) |                  |                         |                          | 0.581    |
| Mean ± SD                                    | 50.9 ± 35.9      | 58.8 ± 43.1             | 48.1 ± 33.2              |          |
| Range                                        | 5.3–166.0        | 17.4–166.0              | 5.3–123.1                |          |
| Median (IQR)                                 | 49.4 (23.3–61.7) | 44.5 (33.4–61.8)        | 49.4 (18.5–61.7)         |          |
| Duration of ICI (weeks)                      |                  |                         |                          | 0.807    |
| Mean ± SD                                    | 20.2 ± 23.6      | 14.3 ± 8.6              | 22.3 ± 27.0              |          |
| Range                                        | 0.1–143.0        | 0.7–28.3                | 0.1–143.0                |          |
| Median (IQR)                                 | 12.3 (7.7–23.1)  | 13.6 (7.8–20.3)         | 12.1 (7.7–23.1)          |          |
| Overall survival (months)                    |                  |                         |                          | 0.007    |
| Mean ± SD                                    | 16.7 ± 11.7      | 8.8 ± 7.2               | 19.6 ± 11.7              |          |
| Range                                        | 0.4–44.8         | 0.4–27.4                | 0.4–44.8                 |          |
| Median (IQR)                                 | 15.3 (6.5–24.6)  | 7.4 (4.9–10.9)          | 20.3 (11.1–26.0)         |          |
| Sample type                                  |                  |                         |                          | 0.010    |
| Metastasis                                   | 32.0             | 12                      | 20                       |          |
| Primary                                      | 13.0             | 0                       | 13                       |          |
| Status at last follow-up                     |                  |                         |                          | 0.134    |
| Alive                                        | 13               | 1                       | 12                       |          |
| Dead                                         | 32               | 11                      | 21                       |          |
| TMB                                          |                  |                         |                          | 0.959    |
| Mean ± SD                                    | 3.7 ± 2.3        | 3.5 ± 1.9               | 3.8 ± 2.5                |          |
| Range                                        | 1.0–9.7          | 1.1–6.7                 | 1.0–9.7                  |          |
| Median (IQR)                                 | 3.3 (2.0–4.4)    | 2.6 (2.0–5.3)           | 3.3 (2.0–4.4)            |          |
| FGA                                          |                  |                         |                          | 0.005    |
| Mean ± SD                                    | 0.4 ± 0.2        | 0.3 ± 0.2               | 0.5 ± 0.2                |          |
| Range                                        | 0.005–0.871      | 0.005–0.629             | 0.092–0.871              |          |
| Median (IQR)                                 | 0.4 (0.3–0.6)    | 0.2 (0.1–0.4)           | 0.5 (0.4–0.6)            |          |
| LST                                          |                  |                         |                          | 0.024    |
| Mean ± SD                                    | 25.0 ± 10.3      | 19.3 ± 9.1              | 27.1 ± 10.0              |          |
| Range                                        | 2.0–51.0         | 2.0–32.0                | 2.0–51.0                 |          |
| Median (IQR)                                 | 25.0 (20.0–29.0) | 22.0 (13.5–25.8)        | 27.0 (22.0–34.0)         |          |

Table 2: HGS patient characteristics. Abbreviations: SD, standard deviation; IQR, interquartile range. *P*-values were obtained using two-sided Wilcoxon-Rank Sum test for continuous variables and Fisher-exact test for categorical variables.

## 423 3.2 Functional biomarkers

424 Genes that exhibit large changes in scalar curvature are identified as the genes  
425 that potentially play a key role in altering the network robustness (i.e., func-  
426 tional connectivity). This requires a reference for comparison, typically using  
427 data collected at a reference time (e.g., after immunotherapy treatment) or data  
428 collected from a reference sample (e.g., normal tissue). Often no such reference  
429 data are available, as was the case here where CNA data from only one time  
430 point were provided. Considering the distinction in survival curves obtained via  
431 curvature, we therefore used the high and low risk groups (as previously defined  
432 by the 25th percentile of the total curvature and dichotomized into low and high  
433 curvature groups, respectively) for points of comparison. Genes were ranked by  
434 the difference in average scalar curvature between the high and low risk groups  
435 ( $\Delta\kappa_{risk}$ ). The change in curvature measures the relative gene implication in the  
436 stabilization (or de-stabilization) of local network robustness driving changes in  
437 feedback connectivity pertaining to survival. Since both increased and decreased  
438 functionality is of interest, the top 50 ranked genes that exhibited the largest  
439 positive ( $\Delta\kappa_{risk} > 0$ ) and largest negative ( $\Delta\kappa_{risk} < 0$ ) change in curvature,  
440 yielding 100 candidate genes associated with risk, are listed in Table 3).

441 Similarly, we investigated the top genes ranked by the difference in average  
442 scalar curvature between sub-groups based on available clinical data as an ex-  
443 ploratory analysis. Of ancillary interest were the top ranked candidate driver  
444 genes that demonstrate functional network response to ICI and their associ-  
445 ation to survival as exhibited by disparities in network robustness measured  
446 between those who were alive or deceased at last follow-up ( $\Delta\kappa_{OS}$ ; Supplemen-  
447 tary Table S1) and predominant changes in functional connectivity due to DNA  
448 level dysregulation that occurs between primary and metastatic tumors ( $\Delta\kappa_{PM}$ ;  
449 Supplementary Table S2).

450 Lastly, we used the network topology itself as a frame of reference. Treating  
451 the fixed network topology as an unweighted graph (i.e., all node weights are  
452 uniformly set to 1), we computed the scalar curvature on this reference topol-  
453 ogy network in the same manner as detailed above. This provides a measure  
454 of discordance in functional connectivity between the HGSOC network and its  
455 underlying topological structure ( $\Delta\kappa_{ref}$ ; Supplementary Table S3). It is inter-  
456 esting to note that in all of the comparisons TP53 appeared at the top of all  
457 positive changes in curvature indicating its functional centrality in HGSOC.

458 Substantial overlap in the top 50 (positive and negative) ranked genes was  
459 noted from all of the comparisons performed, resulting in 171 unique genes  
460 listed in Supplementary Table S4 (Supplementary Figures S8,S9). The choice  
461 of selecting the top 50 genes was largely arbitrary with the following rationale.  
462 The assertion that critical genes may be identified as those exhibiting larger  
463 changes in curvature is supported by the theory, but curvature is a continuous  
464 variable with no obvious cutoff. Since there is also an exploratory component  
465 to this analysis, we opted for a cutoff that would yield a manageable set of  
466 genes that reasonably included the key influential players. Out of 3,489 genes  
467 in the network, this resulted in 50 (positive and negative) candidate genes. See

468 Supplementary Figure [S6](#) for a further sub-curvature analysis on the association  
469 between the highlighted candidate genes and survival.

### 470 **3.3 Relationship between total curvature and genomic fea-** 471 **tures**

472 Lastly, we explored the relationship between total curvature and genomic fea-  
473 tures (TMB, FGA, LST). Linear regression analysis with two-sided Wald test  
474 and Pearson correlation ( $r$ ) analysis were used to assess the correlation be-  
475 tween total curvature and each of the clinical features (TMB:  $p = 0.9674$ ; FGA:  
476  $p = 0.0060$ ; LST:  $p = 0.0868$ ). This analysis suggests that total curvature is  
477 significantly correlated with FGA. This result is not entirely surprising con-  
478 sidering that FGA is a surrogate measure of CN changes and the curvature  
479 measures dysregulation of the CN-weighted network. However, total curvature  
480 yields high and low risk groups with a significant difference in survival whereas  
481 FGA does not. The difference is that total curvature accounts for an extra level  
482 of information, namely the connectivity, that is not evident from CNAs alone.  
483 We believe this is compelling evidence that network dysregulation, as measured  
484 by curvature, has the potential to provide critical insight for analyzing immune  
485 response. More samples are needed to verify this result but it is interesting to  
486 note that further investigation into FGA as a potential biomarker for survival  
487 in HGSOC has been proposed [\[12\]](#). Linear regression plots on the HGS cohort  
488 (n=45) are shown in Figure [6](#).

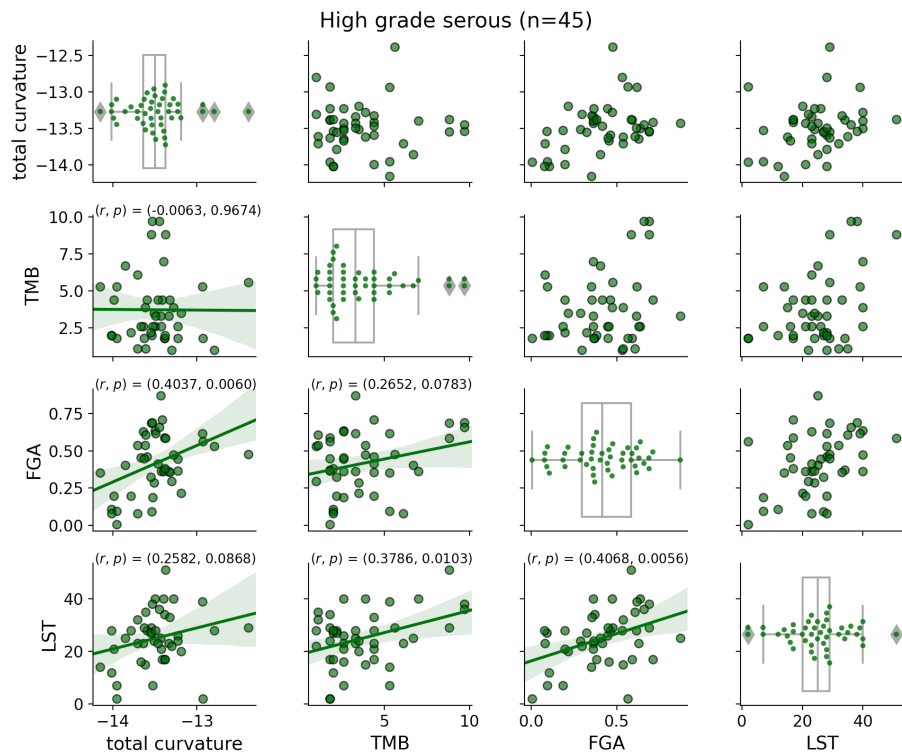

Figure 6: Linear regression of total curvature onto clinical parameters using HGS samples (n=45). The lower triangle includes the Pearson correlation ( $r$ ) and two-sided p-value for the hypothesis test with  $H_0$ : the slope is zero, using Wald test with t-distribution of the test statistic and 95% confidence interval.

| rank | gene     | $\Delta\kappa_{risk} > 0$ | gene    | $\Delta\kappa_{risk} < 0$ |
|------|----------|---------------------------|---------|---------------------------|
| 0    | TP53     | 0.208647                  | CREBBP  | -0.064223                 |
| 1    | ATXN1    | 0.102823                  | SHC1    | -0.031456                 |
| 2    | EP300    | 0.044184                  | PTK2    | -0.026202                 |
| 3    | SMAD2    | 0.042756                  | AR      | -0.025316                 |
| 4    | PIK3R1   | 0.037015                  | MYC     | -0.022608                 |
| 5    | SRC      | 0.033112                  | JUN     | -0.019546                 |
| 6    | SMAD4    | 0.032177                  | LYN     | -0.011148                 |
| 7    | RB1      | 0.031043                  | YWHAQ   | -0.010984                 |
| 8    | ESR1     | 0.027914                  | GSK3B   | -0.009017                 |
| 9    | PRKCA    | 0.027253                  | STAT1   | -0.008248                 |
| 10   | CTNNB1   | 0.025121                  | CDK5    | -0.007480                 |
| 11   | GRB2     | 0.016848                  | FN1     | -0.006947                 |
| 12   | YWHAE    | 0.015125                  | COPS6   | -0.006251                 |
| 13   | DLG4     | 0.014966                  | SMAD3   | -0.006133                 |
| 14   | PRKCD    | 0.014742                  | PAK1    | -0.006091                 |
| 15   | ACTB     | 0.013456                  | MYOC    | -0.005464                 |
| 16   | EWSR1    | 0.012300                  | SMURF1  | -0.005438                 |
| 17   | TGFBR1   | 0.010799                  | SUMO1   | -0.004455                 |
| 18   | RAC1     | 0.008937                  | PARP1   | -0.004274                 |
| 19   | PLCG1    | 0.008423                  | CRMP1   | -0.004271                 |
| 20   | CHD3     | 0.007997                  | HSF1    | -0.004155                 |
| 21   | DVL2     | 0.007476                  | HIPK2   | -0.004038                 |
| 22   | BCL2     | 0.007009                  | CDC42   | -0.004017                 |
| 23   | RANBP9   | 0.006879                  | POU2F1  | -0.003838                 |
| 24   | MAPK1    | 0.006630                  | ACVR1   | -0.003651                 |
| 25   | POLR2A   | 0.006468                  | HTT     | -0.003537                 |
| 26   | CRK      | 0.006375                  | JAK1    | -0.003520                 |
| 27   | APP      | 0.006256                  | PDPK1   | -0.003497                 |
| 28   | PCNA     | 0.005935                  | PIK3R2  | -0.003423                 |
| 29   | COIL     | 0.005350                  | FGFR1   | -0.003352                 |
| 30   | MAPK14   | 0.005097                  | CDKN1A  | -0.003205                 |
| 31   | NR3C1    | 0.004981                  | MAGEA11 | -0.003165                 |
| 32   | AKT1     | 0.004925                  | GNAI1   | -0.003125                 |
| 33   | EGFR     | 0.004918                  | PRKCE   | -0.003090                 |
| 34   | RHOA     | 0.004635                  | XPO1    | -0.002919                 |
| 35   | RAF1     | 0.004159                  | BTK     | -0.002855                 |
| 36   | SMAD7    | 0.004071                  | MUC1    | -0.002814                 |
| 37   | NCOR1    | 0.004038                  | EIF2AK2 | -0.002807                 |
| 38   | RASA1    | 0.003998                  | CASP8   | -0.002758                 |
| 39   | FXR2     | 0.003879                  | CSNK2A2 | -0.002717                 |
| 40   | RPA1     | 0.003560                  | MDM2    | -0.002710                 |
| 41   | HRAS     | 0.003525                  | NTRK1   | -0.002636                 |
| 42   | UBB      | 0.003302                  | ADAM15  | -0.002541                 |
| 43   | BRCA1    | 0.003292                  | FASLG   | -0.002522                 |
| 44   | SUMO4    | 0.003283                  | VIM     | -0.002436                 |
| 45   | ARRB2    | 0.003248                  | CD247   | -0.002372                 |
| 46   | XRCC6    | 0.003065                  | AXIN1   | -0.002333                 |
| 47   | HGS      | 0.003025                  | SMARCA4 | -0.002256                 |
| 48   | HDAC3    | 0.002965                  | SNAPIN  | -0.002246                 |
| 49   | HSP90AA1 | 0.002924                  | PPP2R5A | -0.002187                 |

Table 3: Changes in average scalar curvature based on risk (high vs low). Top 50 genes ranked by positive ( $\Delta\kappa_{risk} > 0$ ) and negative ( $\Delta\kappa_{risk} < 0$ ) difference in average scalar curvature between low risk ( $n = 33$ ) and high risk ( $n = 12$ )

## 489 4 Discussion

### 490 4.1 Biological/molecular relevance

491 Mutational profiles of HGSOCs are characterized by abnormal gene CNAs,  
492 which results in protein overexpression or underexpression [13]. The major-  
493 ity of these OCs are characterized by inactivating mutations or loss of TP53,  
494 leading to aneuploidy, resulting from loss of control of centrosome numbers [34],  
495 and selection for enhanced copy number and gene expression of selected genes  
496 controlling the cell cycle (Figure 7). These OCs commonly overexpress the cy-  
497 clin E protein due to loss of p53 function, resulting in downregulation of p21  
498 (the inhibitor of cyclin E-Cdk-4/6 activity), as well as amplification of cyclin E  
499 [13]. In addition, the serous OCs have one or more of the K-RAS, MYC, and  
500 AKT protein kinase genes overexpressed in the late G-1 phase of the cell cycle  
501 (see Figure 7). The K-RAS activity signals that the cell is stimulated by growth  
502 factors and should progress through the cell cycle, the MYC gene regulates the  
503 transcription of hundreds of genes for cell growth and division and the AKT  
504 gene promotes TORC-2 activity for entry into S-phase and stimulates AKT ki-  
505 nase to enhance the MDM-2 E3 ubiquitin ligase to increase the destruction of  
506 the p53 protein [35]. All of these driver gene products promote a constant over-  
507 expressed signal for cell cycle progression and division. The mutational profile  
508 of this cancer is copy number changes of genes and overexpression of selected  
509 gene products. For that reason, the methods developed here employ copy num-  
510 ber values as the measurement for each node containing a gene in the signal  
511 transduction pathway and the resultant network that is employed to measure  
512 curvature.

513 This mutational profile of serous OC results in the loss of control for duplicat-  
514 ing centrosomes, which sets up the polarity in a cell for the normal segregation  
515 of chromosomes. This is driven by the loss of function of p53 and the overex-  
516 pression of cyclin E, which co-localizes with the centrosome, which duplicates  
517 abnormally producing three or more centrosomes [36]. In the extreme, this re-  
518 sults in chromothripsis, where a chromosome fragments and some of the parts  
519 are reassembled in a random order. This can result in double minute chromo-  
520 somes without a centromere for proper segregation and random partition of the  
521 double minutes and distribution of multiple copy numbers. Often the popula-  
522 tion of cells forms a distribution of copy numbers of a combination of genes,  
523 which are then selected for optimal fitness.

524 Biomarkers of response to immunotherapy in OC remain underdeveloped.  
525 Here, we characterized a cohort of HGSOC patients treated with immunother-  
526 apy for whom detailed treatment, genomic, and survival data were available.  
527 Our analysis indicates that employing the copy number of the relevant genes  
528 as a measurement for each node in a network provides the strongest predictive  
529 power for OS, when compared to prior examined parameters such as TMB, LST,  
530 and FGA (Figure 5). These results suggest that no one gene or even its alter-  
531 ations can predict responses to therapy. Rather it is the integration of the copy  
532 numbers of driver genes and the change of resultant networks formed by these

533 genetic or epigenetic alterations that impacts immunological responsiveness of  
534 the tumor after checkpoint therapy. Employing the overexpression of the same  
535 set of genes and loss of p53 function in a mouse model of ovarian cancers treated  
536 with immunotherapy resulted in similar heterogeneous responses to checkpoint  
537 therapy and the beginnings of experimental tests of genes and products that  
538 could modify the results of the responses to cancer therapies [14]. This permits  
539 the pairing and testing of the type of modeling presented here along with pre-  
540 diction of genes with high curvature with experimental tests in a mouse model  
541 to improve the choice of therapies depending upon the genotypes of the tumors.

542 Interestingly, in non-small cell lung cancer a major tumor antigen, not genet-  
543 ically altered in sequence (not a neo-antigen), was found to be overexpressed in  
544 many different independent tumors [7, 8]. This suggests that in serous OCs, like  
545 non-small cell lung cancers, the higher concentration of a non-genetically altered  
546 tumor antigen was an important variable in responsiveness to checkpoint ther-  
547 apy. Similar conclusions were reached by the mathematical construct employed  
548 here and measured by both abundance and changes in a network architecture  
549 and quantitated by curvature of the edges of the network.

## 550 4.2 Conclusions

551 The marriage of mathematical models with experimental tests is one of the goals  
552 that will speed up the testing of new ideas and directions. The gene lists in Ta-  
553 bles 3, S1, S2, S3, S4 that compare the values of curvature, topology, geometry,  
554 feedback connectivity, and other properties of the networks under study, permit  
555 a selection of the best ways to measure lists of genes that impact success of  
556 immunotherapy. The conclusion of the analysis presented in this work is that  
557 the stability or instability of local network robustness driving changes in feed-  
558 back connectivity has the largest impact upon prognosis after immunotherapy.  
559 The analysis identifies the mutant TP53 gene and its loss of functional protein,  
560 resulting in the inability to control cyclin E activity and the resultant abnor-  
561 malities in copying centrosome numbers accurately as the driving force for this  
562 cancer [34, 36].

563 In conclusion, a network version of the geometric concept of curvature was  
564 introduced to model information variability, robustness, and dysregulation of  
565 cancer gene networks. Total curvature, thus formulated for HGSOc, was demon-  
566 strated to work better in comparison to other standard metrics for the prediction  
567 of response to immunotherapy. Network curvature, formulated in this manner  
568 as a consistent information passing measure, thus appears to effectively capture  
569 global gene signaling dysregulation, and furthermore functions to identify key  
570 contributors to signaling dysregulation. Establishing total curvature as a useful  
571 clinical biomarker, possibly in combination with FGA (also proposed as a po-  
572 tential biomarker in ovarian cancer [12]), will require larger datasets in order to  
573 further quantify and validate these results.



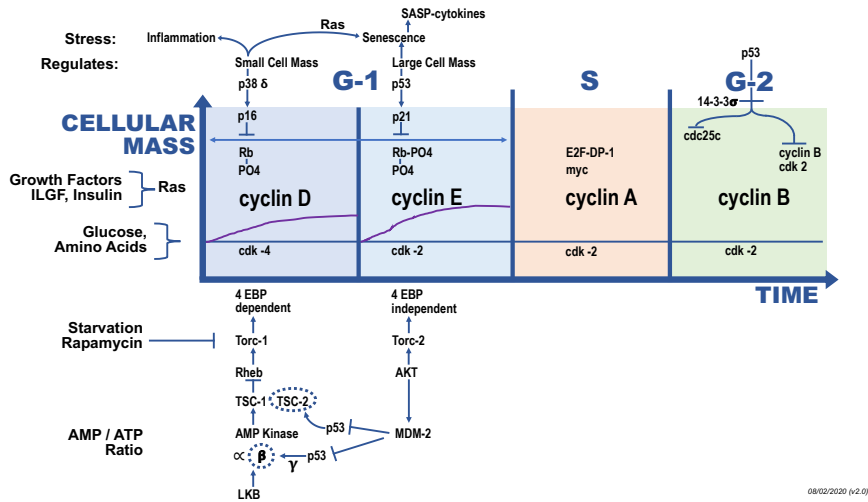

Figure 7: Genes involved in Serous Ovarian Cancer in the G-1 Phase of the Cell Cycle: The G-1 phase of the cell cycle can be divided up into cyclin D-cdk4/6 early events and cyclin E-cdk2 later events. The inhibitors of these protein kinase activities, p38 and p16 for cyclin D and p53 and p21 for cyclin E are shown above the cyclin D and E panels. The activating pathways for cyclin D (TORC-1) and cyclin E (TORC-2) are shown below these panels. The mutational loss of TP53 and the amplification of cyclin E results in the loss of control of cyclin E levels and the hyper-amplification of centrosome numbers destabilizing the copy number control of chromosome numbers (aneuploidy) and gene copy numbers. Serous ovarian cancers commonly have K-RAS, MYC and AKT genes or chromosome amplifications and overexpression. The p21 gene is not mutated suggesting that it has additional functions required elsewhere for viability or that additional functions of p53 must be lost for ovarian cancers. Every gene highlighted in this figure can be found genetically altered in a cancer of other tissue types.

## 574 **Code availability**

575 All genetic data and code will be made publicly available upon manuscript  
576 publication.

## 577 **Acknowledgements**

578 The research of A.T. was funded in part by grants from the Air Force Office  
579 of Scientific Research (FA9550-17-1-0435, FA9550-20-1-0029), and NIH grants  
580 (R01-AG048769, R21-CA234752). J.D. and A.T. are supported by a grant from  
581 the Breast Cancer Research Foundation (BCRF-17-193). D.Z. is supported by  
582 the Ovarian Cancer Research Foundation Liz Tilberis Award, and the Depart-  
583 ment of Defense Ovarian Cancer Research Academy (OC150111). J.R.-F. and  
584 B.W. are funded in part by the Breast Cancer Research Foundation and by a  
585 grant from the National Institutes of Health/ National Cancer Institute (P50  
586 CA247749 01). The research was supported by the MSK Cancer Center Support  
587 Grant/Core Grant (P30 CA008748).

## 588 **Author Contributions**

589 R.E. and A.T. developed the mathematical methods, and J.O. developed the  
590 bioinformatic analysis. A.L. provided the critical biological and clinical analysis  
591 and interpretation. L.N. conceived the project, and contributed to the clinical  
592 and biological interpretation of the methodology. J.D. provided insights into  
593 interpreting the results and clarifying the technical methods, and D.Z. provided  
594 key clinical insights. R.E. wrote the paper, and all authors edited the paper.  
595 D.Z., J.R.-F., Y.L., P.S., and B.W. provided the data and assisted in the clinical  
596 interpretation of the results. All authors have read and approved the final  
597 manuscript.

## 598 **Potential Conflict of Interests**

599 D.Z. reports clinical research support to his institution from Astra Zeneca,  
600 Plexxikon, and Genentech; and personal/consultancy fees from Merck, Syn-  
601 logic Therapeutics, GSK, Bristol Myers Squibb, Genentech, Xencor, Memgen,  
602 and Agenus. These are all outside of the scope of the submitted work.

603 J.R.-F. reports receiving personal/consultancy fees from Goldman Sachs,  
604 REPARE Therapeutics and Paige.AI, membership of the scientific advisory  
605 boards of VolitionRx, REPARE Therapeutics and Paige.AI, membership of the  
606 Board of Directors of Grupo Oncoclinicas, and ad hoc membership of the sci-  
607 entific advisory boards of Roche Tissue Diagnostics, Ventana Medical Systems,  
608 Novartis, Genentech and InVicro. These are all outside the scope of the sub-  
609 mitted work.

610 B.W. reports ad hoc membership of the advisory board of Repare Thera-  
611 peutics, outside the scope of the submitted work.

612 J.D. is a shareholder in PaigeAI. This is outside the scope of the submitted  
613 work.

614 Y.L. reports research funding from AstraZeneca and GSK/Tesaro outside  
615 the scope of the submitted work.

616 None of the other authors report a potential COI.

## 617 References

618 [1] T. t. Keshava Prasad, R. Goel, K. Kandasamy, S. Keerthikumar, S. Kumar,  
619 S. Mathivanan, D. Telikicherla, R. Raju, B. Shafreen, A. Venugopal *et al.*,  
620 “Human protein reference database: 2009 update,” *Nucleic Acids Research*,  
621 vol. 37, no. suppl\_1, pp. D767–D772, 2009.

622 [2] S. Peri, J. D. Navarro, R. Amanchy, T. Z. Kristiansen, C. K. Jonnalagadda,  
623 V. Surendranath, V. Niranjana, B. Muthusamy, T. Gandhi, M. Gronborg  
624 *et al.*, “Development of human protein reference database as an initial  
625 platform for approaching systems biology in humans,” *Genome Research*,  
626 vol. 13, no. 10, pp. 2363–2371, 2003.

627 [3] K. Luck, D.-K. Kim, L. Lambourne, K. Spirohn, B. E. Begg, W. Bian,  
628 R. Brignall, T. Cafarelli, F. J. Campos-Laborie, B. Charloreaux *et al.*, “A  
629 reference map of the human binary protein interactome,” *Nature*, vol. 580,  
630 no. 7803, pp. 402–408, 2020.

631 [4] D. Szklarczyk, A. L. Gable, D. Lyon, A. Junge, S. Wyder, J. Huerta-Cepas,  
632 M. Simonovic, N. T. Doncheva, J. H. Morris, P. Bork *et al.*, “String v11:  
633 protein–protein association networks with increased coverage, supporting  
634 functional discovery in genome-wide experimental datasets,” *Nucleic Acids*  
635 *Research*, vol. 47, no. D1, pp. D607–D613, 2019.

636 [5] R. Sandhu, T. Georgiou, E. Reznik, L. Zhu, I. Kolesov, Y. Senbabaoglu, and  
637 A. Tannenbaum, “Graph curvature for differentiating cancer networks,”  
638 *Scientific Reports*, vol. 5, no. 1, pp. 1–13, 2015.

639 [6] Y. Ollivier, “Ricci curvature of markov chains on metric spaces,” *J. Func-*  
640 *tional Analysis*, vol. 256, pp. 810–864, 2009.

641 [7] A. Reuben, J. Zhang, S.-H. Chiou, R. M. Gittelman, J. Li, W.-C. Lee,  
642 J. Fujimoto, C. Behrens, X. Liu, F. Wang *et al.*, “Comprehensive t cell  
643 repertoire characterization of non-small cell lung cancer,” *Nature commu-*  
644 *nications*, vol. 11, no. 1, pp. 1–13, 2020.

645 [8] S.-H. Chiou, D. Tseng, A. Reuben, V. Mallajosyula, I. S. Molina, S. Conley,  
646 J. Wilhelmy, A. M. McSween, X. Yang, D. Nishimiya *et al.*, “Global analysis  
647 of shared t cell specificities in human non-small cell lung cancer enables hla

- 648 inference and antigen discovery,” *Immunity*, vol. 54, no. 3, pp. 586–602,  
649 2021.
- 650 [9] C. Shao, G. Li, L. Huang, S. Pruitt, E. Castellanos, G. Frampton *et al.*,  
651 “Prevalence of high tumor mutational burden and association with survival  
652 in patients with less common solid tumors,” *JAMA Network Open*, vol. 3,  
653 pp. 1–12, 2020.
- 654 [10] M. D. Hellmann, M. K. Callahan, M. M. Awad, E. Calvo, P. A. Ascierto,  
655 A. Atmaca, N. A. Rizvi, F. R. Hirsch, G. Selvaggi, J. D. Szustakowski  
656 *et al.*, “Tumor mutational burden and efficacy of nivolumab monotherapy  
657 and in combination with ipilimumab in small-cell lung cancer,” *Cancer cell*,  
658 vol. 33, no. 5, pp. 853–861, 2018.
- 659 [11] A. Snyder, V. Makarov, T. Merghoub, J. Yuan, J. M. Zaretsky,  
660 A. Desrichard, L. A. Walsh, M. A. Postow, P. Wong, T. S. Ho *et al.*,  
661 “Genetic basis for clinical response to ctla-4 blockade in melanoma,” *New*  
662 *England Journal of Medicine*, vol. 371, no. 23, pp. 2189–2199, 2014.
- 663 [12] Y. L. Liu, P. Selenica, Q. Zhou, A. Iasonos, M. Callahan, N. Z. Feit,  
664 J. Boland, I. Vazquez-Garcia, D. Mandelker, A. Zehir *et al.*, “Brca mu-  
665 tations, homologous dna repair deficiency, tumor mutational burden, and  
666 response to immune checkpoint inhibition in recurrent ovarian cancer,”  
667 *JCO Precision Oncology*, vol. 4, pp. 665–679, 2020.
- 668 [13] S. Zhang, S. Iyer, H. Ran, I. Dolgalev, S. Gu *et al.*, “Genetically  
669 defined syngeneic organoid platforms for developing combination therapies  
670 for ovarian cancer,” *Cancer Discovery*, 2021. [Online]. Available:  
671 <https://doi.10.1158/2159-8290.CD-20-0455>
- 672 [14] S. Iyer, S. Zhang, S. Yucel, H. Horn, S. G. Smith *et al.*, “Genetically  
673 defined syngeneic mouse models of ovarian cancer as tools for the  
674 discovery of combination immunotherapy,” *Cancer Discovery*, 2021.  
675 [Online]. Available: <https://doi.10.1158/2159-8290.CD-20-0455>
- 676 [15] J. Lott and C. Villani, “Ricci curvature for metric-measure spaces via op-  
677 timal transport,” *Annals of Mathematics*, pp. 903–991, 2009.
- 678 [16] M.-K. von Renesse and K.-T. Sturm, “Transport inequalities, gradient esti-  
679 mates, entropy and ricci curvature,” *Communications on Pure and Applied*  
680 *Mathematics*, vol. 58, no. 7, pp. 923–940, 2005.
- 681 [17] R. S. Sandhu, T. T. Georgiou, and A. R. Tannenbaum, “Ricci curvature:  
682 An economic indicator for market fragility and systemic risk,” *Science Ad-*  
683 *vances*, vol. 2, no. 5, p. e1501495, 2016.
- 684 [18] F. Bauer, J. Jost, and S. Liu, “Ollivier-Ricci curvature and the spectrum  
685 of the normalized graph laplace operator,” *Math. Res. Lett.*, vol. 19, p.  
686 11851205, 2012.

- 687 [19] E. Lengvel, “Review: Ovarian cancer development and metastasis,” *American Journal of Pathology*, vol. 177, pp. 1053–1064, 2010.  
688
- 689 [20] M. P. d. Carmo, *Riemannian Geometry*. Birkhäuser, 1992.
- 690 [21] G. Monge, “Mémoire sur la théorie des déblais et des remblais,” *Histoire de l’Académie Royale des Sciences de Paris*, 1781.  
691
- 692 [22] L. V. Kantorovich, “On a problem of Monge,” in *CR (Doklady) Acad. Sci. URSS (NS)*, vol. 3, 1948, pp. 225–226.  
693
- 694 [23] C. Villani, *Topics in Optimal Transportation*. American Mathematical Soc., 2003, no. 58.  
695
- 696 [24] —, *Optimal Transport: Old and New*. Springer Science & Business Media, 2008, vol. 338.  
697
- 698 [25] L. Ambrosio, “Lecture notes on optimal transport problems,” in *Mathematical Aspects of Evolving Interfaces*. Springer, 2003, pp. 1–52.  
699
- 700 [26] C. R. Banerji, D. Miranda-Saavedra, S. Severini, M. Widschwendter, T. Enver, J. X. Zhou, and A. E. Teschendorff, “Cellular network entropy as the energy potential in waddington’s differentiation landscape,” *Scientific Reports*, vol. 3, no. 1, pp. 1–7, 2013.  
701  
702  
703
- 704 [27] W. Zachary, “An information flow model for conflict and fission in small groups,” *J. Anthropological Research*, vol. 33, pp. 452–473, 1977.  
705
- 706 [28] H. Farooq, Y. Chen, T. T. Georgiou, A. Tannenbaum, and C. Lenglet, “Network curvature as a hallmark of brain structural connectivity,” *Nature Communications*, vol. 10, no. 1, pp. 1–11, 2019.  
707  
708
- 709 [29] Y. Chen, F. D. Cruz, R. Sandhu, A. L. Kung, P. Mundi, J. O. Deasy, and A. Tannenbaum, “Pediatric sarcoma data forms a unique cluster measured via the earth mover’s distance,” *Scientific Reports*, vol. 7, no. 1, pp. 1–9, 2017.  
710  
711  
712
- 713 [30] L. Demetrius, V. M. Gundlach, and G. Ochs, “Complexity and demographic stability in population models,” *Theoretical Population Biology*, vol. 65, no. 3, pp. 211–225, 2004.  
714  
715
- 716 [31] B. Lausen, T. Hothorn, F. Bretz, and M. Schumacher, “Assessment of optimal selected prognostic factors,” *Biometrical Journal: Journal of Mathematical Methods in Biosciences*, vol. 46, no. 3, pp. 364–374, 2004.  
717  
718
- 719 [32] T. Hothorn and B. Lausen, “On the exact distribution of maximally selected rank statistics,” *Computational Statistics & Data Analysis*, vol. 43, no. 2, pp. 121–137, 2003.  
720  
721

- 722 [33] C. Davidson-Pilon, J. Kalderstam, N. Jacobson *et al.*, “Cam-  
723 davidsonpilon/lifelines: v0.25.6,” Oct. 2020. [Online]. Available:  
724 <https://doi.org/10.5281/zenodo.4136578>
- 725 [34] K. Fukasawa, T. Choi, R. Kuriyama, S. Rulong, and G. Vande Woude,  
726 “Abnormal centrosome amplification in the absence of p53,” *Science*, pp.  
727 1744–1747, 1996.
- 728 [35] A. J. Levine, “800 million years of evolution and 40 years of research,”  
729 *Nature Reviews of Cancer*, vol. 20, pp. 471–480, 2020.
- 730 [36] J. Mussman, H. F. Horn, P. E. Carroll<sup>1</sup>, M. Okuda<sup>1</sup>, P. Tarapore<sup>1</sup>, L. A.  
731 Donehower, and K. Fukasawa, “Synergistic induction of centrosome hyper-  
732 amplification by loss of p53 and cyclin e overexpression,” *Oncogene*, vol. 19,  
733 pp. 1635–1646, 2020.
- 734 [37] R. M. Simon, J. Subramanian, M.-C. Li, and S. Menezes, “Using cross-  
735 validation to evaluate predictive accuracy of survival risk classifiers based  
736 on high-dimensional data,” *Briefings in Bioinformatics*, vol. 12, no. 3, pp.  
737 203–214, 2011.
- 738 [38] M. Bastian, S. Heymann, and M. Jacomy, “Gephi: An open source software  
739 for exploring and manipulating networks,” 2009. [Online]. Available:  
740 <http://www.aaii.org/ocs/index.php/ICWSM/09/paper/view/154>
